# Supplementary material
Source: publisher site journal article supplement (https://www.degruyterbrill.com/publication/isbn/9783110286250/downloadAsset/9783110286250_Inhaltsverzeichnis.pdf)
Supplement: Supplementary file 1 [file 9783110286250_Inhaltsverzeichnis.pdf]

# **Inhalt**

## **Einleitung — 1**

### **Erster Teil: Zur mündlichen Prüfung im Allgemeinen — 3**

- I. Die äußerlichen Besonderheiten der Juristischen Staatsprüfung — **3**
- II. Das Vorgespräch — **10**
- III. Heinrich von Kleists „Über die allmähliche Verfertigung der Gedanken beim Reden“ im Spiegel der mündlichen Staatsprüfung — **11**
- IV. Benotung und Vornotenorientierung — **15**
- V. Der Umgang mit diesem Buch — **17**

### **Zweiter Teil: Die Prüfungsgespräche — 19**

- I. Vorbemerkung zu den folgenden Prüfungsgesprächen — **19**
- II. Die Prüfungsgespräche im Einzelnen — **20**
  - 1. Prüfungsgespräch — **20**
  - 2. Prüfungsgespräch — **29**
  - 3. Prüfungsgespräch — **41**
  - 4. Prüfungsgespräch — **55**
  - 5. Prüfungsgespräch — **68**
  - 6. Prüfungsgespräch — **80**
  - 7. Prüfungsgespräch — **92**
  - 8. Prüfungsgespräch — **102**
  - 9. Prüfungsgespräch — **113**
  - 10. Prüfungsgespräch — **121**

### **Dritter Teil: Der Kurzvortrag — 139**

- I. Gang und Ablauf der Prüfung — **139**
- II. Typen von Prüfungsthemen — **143**
- III. Beispiel für einen Kurzvortrag: — **146**
  - 1. Aufgabe — **146**
  - 2. Unverbindliche Lösungshinweise zum Fall — **147**
  - 3. Unverbindliche Lösungshinweise zur Zusatzfrage — **149**
